# Supplementary material
Source: PubMed Central journal article supplement (PMC3256701)
Supplement: supp_50.1.37_Table_S1.pdf [file supp_50.1.37_Table_S1.pdf]

Table S1. Reference antisera to each subtype of avian influenza viruses for HI and NI tests

| ID   | Antisera against                  | Subtype of virus | Sera for HI test <sup>a</sup> | Sera for NI test <sup>b</sup> |
|------|-----------------------------------|------------------|-------------------------------|-------------------------------|
| S8   | A/swine/Iowa/15/1930              | H1N1             | anti-H1                       |                               |
| S148 | A/swine/Niigata/729E/2004         | H1N2             | anti-H1                       |                               |
| S3   | A/Singapore/1/1957                | H2N2             | anti-H2                       |                               |
| S40  | A/mallard/Alberta/77/1977         | H2N3             | anti-H2                       |                               |
| S19  | A/budgerigar/Aichi/1/1977         | H3N8             | anti-H3                       |                               |
| S154 | A/swine/Wadayama/5/1965           | H3N2             | anti-H3                       |                               |
| S36  | A/budgerigar/Hokkaido/1/1977      | H4N6             | anti-H4                       |                               |
| S135 | A/duck/Osaka/1/2005               | H4N8             | anti-H4                       | anti N8                       |
| S44  | A/chicken/Yamaguchi/7/2004        | H5N1             | anti-H5                       |                               |
| S85  | A/chicken/Ibaraki/1/2005          | H5N2             | anti-H5                       |                               |
| S27  | A/tern/South Africa/1961          | H5N3             | anti-H5                       |                               |
| S65  | A/w. swan/Shimane/580/2002        | H5N3             | anti-H5                       | anti N3                       |
| S18  | A/turkey/Ontario/7732/1966        | H5N9             | anti-H5                       | anti N9                       |
| S28  | A/shearwater/Australia/1/1972     | H6N5             | anti-H6                       |                               |
| S72  | A/duck/Tsukuba/11/2004            | H6N5             | anti-H6                       |                               |
| S171 | A/turkey/Italy/4580/1999          | H7N1             | anti-H7                       | anti N1                       |
| S20  | A/chicken/Japan/1925              | H7N7             | anti-H7                       |                               |
| S35  | A/w. swan/Shimane/42/1980         | H7N7             | anti-H7                       |                               |
| S17  | A/turkey/Ontario/6118/1968        | H8N4             | anti-H8                       | anti N4                       |
| S33  | A/turkey/Wisconsin/1966           | H9N2             | anti-H9                       | anti N2                       |
| S66  | A/w. swan/Shimane/500-2/1983      | H10N9            | anti-H10                      |                               |
| S12  | A/chicken/Germany/"N"/1945        | H10N7            | anti-H10                      | anti N7                       |
| S13  | A/duck/England/1956               | H11N6            | anti-H11                      | anti N6                       |
| S38  | A/duck/Alberta/60/1976            | H12N5            | anti-H12                      | anti N5                       |
| S39  | A/gull/Maryland/704/1977          | H13N6            | anti-H13                      |                               |
| S42  | A/mallard/Gurjev/263/1982         | H14N5            | anti-H14                      |                               |
| S43  | A/duck/Australia/341/1983         | H15N8            | anti-H15                      |                               |
| S184 | A/black-headed gull/Sweden/5/1995 | H16N3            | anti-H16                      |                               |

<sup>a</sup> Hemagglutination inhibition test

<sup>b</sup> Neuraminidase inhibition test
